# Supplementary material for: A Simple Predictive Enhancer Syntax for Hindbrain Patterning Is Conserved in Vertebrate Genomes
Source: PLoS One. 2015 Jul 1;10(7):e0130413. doi: 10.1371/journal.pone.0130413 (PMC4489388; doi:10.1371/journal.pone.0130413)
Supplement: S3 Table — Table shows the total number of injected embryos, the total number of GFP positive embryos and the number of embryos positive for each tissue. 67/75 elements were considered to be hindbrain enhancers. (XLSX) [file pone.0130413.s008.xlsx]

## Sheet: 48h
CNE	total injected	total gfp+	forebrain	midbrain	hindbrain	spinal cord	other neuron	eye	ear	lateral line	notochord	muscle	blood	heart	skin	pharyngeal arches	pectoral fin	% of hb+ (total)	% of hb+ (gfp+)	main tissue
auts2_8975	30	19	16	1	19	0	0	0	0	0	0	11	1	10	0	0	0	0.633333	1	hindbrain
barhl2_3939	96	20	6	6	6	6	5	1	0	0	1	18	0	1	0	0	0	0.0625	0.3	none
bnc2_8570	30	22	20	19	22	20	1	11	0	0	0	9	0	0	0	0	0	0.733333	1	hindbrain
cst_9947	60	45	0	0	9	7	1	0	0	0	0	10	0	45	0	0	0	0.15	0.2	heart
dachd_229	30	1	0	0	1	0	0	0	0	0	0	0	0	0	0	0	0	0.0333333	1	none
dachd_232	70	50	11	30	47	0	0	25	0	0	0	0	0	20	0	0	0	0.671429	0.94	hindbrain
dachd_240	67	45	20	20	43	21	2	18	0	0	1	11	0	11	0	0	0	0.641791	0.955556	hindbrain
emx2_4548	30	11	3	4	2	2	0	0	0	0	0	7	9	8	11	0	0	0.0666667	0.181818	skin
esrrb_9004	38	25	9	5	21	16	1	17	0	0	0	10	0	15	0	0	0	0.552632	0.84	hindbrain
esrrb_9024	91	71	41	40	70	38	11	35	0	0	2	15	6	18	0	0	0	0.769231	0.985915	hindbrain
esrrb_9032	38	17	0	17	17	9	0	0	0	0	0	16	0	16	0	0	0	0.447368	1	midbrain, hindbrain
evi1_10711	45	15	0	0	15	0	0	0	0	0	0	0	0	10	0	0	0	0.333333	1	hindbrain
evi1_11239	30	28	0	0	0	0	0	0	0	0	0	11	0	28	0	0	0	0	0	heart
fign_5158	42	16	0	0	16	0	0	0	0	0	0	0	0	0	16	0	0	0.380952	1	hindbrain, skin
fign_5161	54	32	1	11	31	9	7	3	5	0	1	21	3	6	1	0	0	0.574074	0.96875	hindbrain
foxd3_330	46	21	21	21	21	21	20	15	0	0	0	2	1	3	2	0	1	0.456522	1	CNS
foxp1_892	86	30	21	20	27	25	3	18	1	0	0	21	1	0	0	0	0	0.313953	0.9	hindbrain
foxp1_906	61	37	29	0	37	21	0	0	0	0	30	0	0	16	0	0	0	0.606557	1	hindbrain
foxp2_3531	30	21	9	10	11	1	0	21	0	0	0	0	0	7	9	0	9	0.366667	0.52381	eye
hmx2_9711/2	82	69	35	41	56	69	38	60	0	0	0	0	0	0	0	50	0	0.682927	0.811594	spinal cord
hmx2_9741	78	19	4	3	9	0	10	0	0	0	0	0	0	11	0	0	0	0.115385	0.473684	heart
hoxa_12003	58	29	5	11	29	1	9	15	0	0	0	0	0	10	0	9	20	0.5	1	hindbrain
hoxa_12006	41	30	19	7	20	3	19	24	0	0	0	11	0	0	0	24	18	0.487805	0.666667	eye, pharyngeal arches
hoxd_10470	35	17	11	11	17	9	15	6	2	0	0	0	0	0	0	3	1	0.485714	1	hindbrain
hoxd_10483	112	50	37	41	41	21	39	0	0	0	0	18	0	19	6	1	0	0.366071	0.82	midbrain, hindbrain
hoxd_10498	38	25	21	16	21	0	1	2	0	0	1	19	0	13	21	21	13	0.552632	0.84	forebrain, hindbrain, skin, pharyngeal arches
hoxd_10520/1	44	22	22	22	22	22	22	22	0	0	0	7	1	4	0	0	0	0.5	1	CNS, other neuron, eye
irx1/2/4_6679	50	10	1	1	1	1	0	0	0	0	6	8	0	1	0	0	0	0.02	0.1	muscle
irx3/5/6_7352	41	35	17	1	17	17	0	25	0	0	0	16	1	25	5	6	0	0.414634	0.485714	eye, heart
lmo1_6396	111	90	89	80	85	78	9	6	0	0	0	89	0	89	0	75	0	0.765766	0.944444	forebrain, muscle, heart
maf_11498	136	80	60	64	70	55	6	0	61	0	0	11	1	50	0	0	0	0.514706	0.875	hindbrain
meis1_1705	117	96	6	8	96	90	7	0	0	0	6	4	1	6	0	0	0	0.820513	1	hindbrain
meis2a_1042	84	50	7	19	50	50	1	3	1	0	0	6	1	1	0	5	1	0.595238	1	hindbrain
meis2a_1089	157	92	30	29	92	69	15	3	0	0	0	6	1	1	0	35	6	0.585987	1	hindbrain
meis2a_965	105	71	0	0	51	29	8	41	5	0	0	11	0	1	0	21	19	0.485714	0.71831	hindbrain
nr2f2_8394	90	60	0	0	60	6	0	0	0	0	5	0	0	0	0	0	0	0.666667	1	hindbrain
nr4a2b_2390	44	22	0	19	22	17	0	0	0	0	0	2	0	7	0	0	0	0.5	1	hindbrain
pax1a_10260	32	15	11	11	14	6	7	9	6	0	1	12	1	0	0	3	6	0.4375	0.933333	hindbrain
pax2a_135	34	23	23	9	17	18	3	8	6	0	0	11	0	9	0	0	0	0.5	0.73913	forebrain
pax2a_174	87	84	0	0	84	0	0	84	0	0	0	0	0	0	0	0	0	0.965517	1	hindbrain, eye
pax2a_90	55	41	6	0	26	0	9	0	0	0	0	41	0	0	0	0	0	0.472727	0.634146	muscle
pbx3b_3200	115	65	7	12	65	32	0	31	0	0	0	0	0	0	28	0	0	0.565217	1	hindbrain
pbx3b_3211	52	41	11	13	41	1	0	0	0	0	0	29	0	17	0	0	0	0.788462	1	hindbrain
pbx3b_3212/3	40	25	10	25	25	0	0	0	0	0	0	0	0	12	0	0	0	0.625	1	midbrain, hindbrain
pbx3b_3244	45	28	28	28	28	20	21	28	0	0	0	6	1	0	0	28	0	0.622222	1	CNS, eye, pharyngeal arches
pbx3b_3253	96	50	0	0	50	50	0	0	0	0	28	35	0	0	0	0	0	0.520833	1	hindbrain, spinal cord
pou3f1_7785	53	49	0	0	49	18	0	0	0	0	0	49	0	0	0	0	0	0.924528	1	hindbrain, muscle
pou3f2b_9802	83	54	41	45	54	54	0	0	0	0	0	50	0	43	0	0	0	0.650602	1	hindbrain, spinal cord
pou6f2_1568	56	7	0	0	7	1	0	5	0	0	0	5	0	4	0	0	0	0.125	1	none
sall3a_2991	30	18	11	17	18	16	18	6	0	0	14	0	0	0	0	17	0	0.6	1	hindbrain, other neuron
sall3a_3016	48	20	6	15	19	19	0	13	0	0	19	15	5	13	0	0	19	0.395833	0.95	hindbrain, spinal cord, notochord, pectoral fin
satb1_5966	125	67	28	4	48	0	19	0	0	0	0	1	8	19	0	0	0	0.384	0.716418	hindbrain
shox_11103	69	39	11	11	39	39	31	6	0	0	0	0	0	0	0	0	0	0.565217	1	hindbrain, spinal cord
shox2_5627	30	0	0	0	0	0	0	0	0	0	0	0	0	0	0	0	0	0	0	none
shox2_5643	98	73	0	30	73	0	0	0	0	0	0	0	0	0	0	0	0	0.744898	1	hindbrain
sox14_11250	92	88	60	59	54	61	0	71	0	0	6	88	0	0	0	68	0	0.586957	0.613636	muscle
sox6_2298	30	19	0	0	0	8	0	0	0	0	0	0	0	19	0	0	0	0	0	heart
tcf7l2_5398	72	50	50	6	33	19	42	27	0	0	0	0	0	0	0	0	0	0.458333	0.66	forebrain
tshz1_8799	56	50	8	11	20	13	0	50	0	0	0	18	0	26	0	0	0	0.357143	0.4	eye
tshz1_8800	40	18	7	7	18	16	18	8	0	0	0	9	3	4	0	0	0	0.45	1	hindbrain, other neuron
tshz1_8804	37	21	0	0	21	0	0	0	0	0	15	0	0	0	0	0	0	0.567568	1	hindbrain
tshz2_8749	56	35	35	19	28	7	0	0	0	0	0	0	0	0	0	0	0	0.5	0.8	forebrain
tshz3_7689	52	1	0	0	1	1	0	0	0	0	0	0	0	0	0	0	0	0.0192308	1	none
tshz3_7761	61	31	0	0	31	7	5	1	3	0	0	2	1	18	0	31	0	0.508197	1	hindbrain, pharyngeal arches
uncx_9830	47	9	1	1	8	4	1	0	0	0	1	0	0	0	0	0	0	0.170213	0.888889	none
zic1_5745	31	19	1	1	19	19	0	0	0	0	0	19	0	0	0	0	0	0.612903	1	hindbrain, spinal cord, muscle
zic1_5763	101	56	55	10	32	17	30	16	1	0	0	23	1	11	23	13	50	0.316832	0.571429	forebrain
znf503_10049	48	24	0	0	24	20	0	0	0	0	0	0	0	0	0	16	0	0.5	1	hindbrain
znf503_10105	42	34	2	3	34	6	1	3	0	0	3	17	1	0	0	34	0	0.809524	1	hindbrain, pharyngeal arches
znf503_10147	107	56	0	0	56	0	0	0	0	0	0	0	0	0	0	0	0	0.523364	1	hindbrain
znf503_10156	34	16	0	0	16	0	0	0	0	0	0	0	0	0	0	0	0	0.470588	1	hindbrain
znf503_10193	114	45	23	39	45	41	40	36	0	0	0	0	0	0	0	0	0	0.394737	1	hindbrain
znf503_10196	105	55	8	6	30	19	55	0	0	0	0	55	0	0	0	55	0	0.285714	0.545455	other neuron, muscle, pharyngeal arches
znf703_10876	62	30	0	0	30	7	0	0	0	0	0	0	0	0	0	30	0	0.483871	1	hindbrain, pharyngeal arches
znf703_10897	32	10	2	3	10	4	0	3	0	0	0	0	0	0	0	10	0	0.3125	1	hindbrain, pharyngeal arches

## Sheet: 72h
CNE	total injected	total gfp+	forebrain	midbrain	hindbrain	spinal cord	other neuron	eye	ear	lateral line	notochord	muscle	blood	heart	skin	pharyngeal arches	pectoral fin	% of hb+ (total)	% of hb+ (gfp+)	main tissue
auts2_8975	30	7	3	1	4	0	0	0	0	0	2	7	0	5	0	0	0	0.133333	0.571429	none
barhl2_3939	71	6	2	2	2	2	1	0	0	0	1	6	0	1	0	0	0	0.028169	0.333333	none
bnc2_8570	30	11	11	11	11	11	2	5	0	0	0	7	0	0	0	0	0	0.366667	1	CNS
cst_9947	55	42	0	0	2	1	1	0	0	0	0	6	0	42	0	0	0	0.0363636	0.047619	heart
dachd_229	30	1	0	0	1	0	0	0	0	0	0	0	0	0	0	0	0	0.0333333	1	none
dachd_232	59	21	5	5	5	0	0	11	0	0	0	0	0	18	0	0	0	0.0847458	0.238095	none
dachd_240	65	30	11	11	27	18	3	10	0	0	0	6	0	5	0	0	0	0.415385	0.9	hindbrain
emx2_4548	30	9	3	4	2	2	0	0	0	0	0	7	9	8	9	0	0	0.0666667	0.222222	skin
esrrb_9004	33	10	5	3	10	10	0	8	0	0	0	7	0	4	0	0	0	0.30303	1	hindbrain
esrrb_9024	91	71	41	40	70	38	11	35	0	0	2	15	6	18	0	0	0	0.769231	0.985915	hindbrain
esrrb_9032	31	9	0	9	9	3	0	0	0	0	0	6	0	7	0	0	0	0.290323	1	midbrain, hindbrain
evi1_10711	30	4	0	0	4	0	0	0	0	0	0	0	0	3	0	0	0	0.133333	1	none
evi1_11239	30	21	0	0	0	0	0	0	0	0	0	11	0	21	0	0	0	0	0	heart
fign_5158	33	11	0	0	11	0	0	0	0	0	0	0	0	0	11	0	0	0.333333	1	hindbrain, skin
fign_5161	40	11	0	2	7	4	1	0	0	0	0	11	1	1	0	0	0	0.175	0.636364	muscle
foxd3_330	44	23	23	23	23	23	19	10	0	0	0	3	3	4	5	0	1	0.522727	1	CNS
foxp1_892	71	12	7	6	9	9	0	6	0	0	0	12	1	0	0	0	0	0.126761	0.75	muscle
foxp1_906	60	13	11	0	12	6	0	0	0	0	13	0	0	13	0	0	0	0.2	0.923077	notochord, heart
foxp2_3531	30	5	0	0	0	0	0	3	0	0	0	0	0	5	4	0	5	0	0	heart, pectoral fin
hmx2_9711/2	72	17	5	6	8	7	17	17	0	0	0	0	0	0	0	17	0	0.111111	0.470588	other neuron, eye, pharyngeal arches
hmx2_9741	76	10	1	3	8	0	9	0	0	0	0	1	2	9	0	0	0	0.105263	0.8	heart
hoxa_12003	50	8	1	1	2	1	5	8	0	0	0	0	0	8	0	4	8	0.04	0.25	eye, heart, pectoral fin
hoxa_12006	37	11	9	4	3	5	7	11	0	0	0	7	0	0	0	11	11	0.0810811	0.272727	eye, pharyngeal arches, pectoral fin
hoxd_10470	29	6	3	3	4	2	1	1	1	0	0	0	0	1	0	2	0	0.137931	0.666667	none
hoxd_10483	97	11	6	7	7	3	1	0	0	0	0	11	0	11	1	1	0	0.0721649	0.636364	muscle, heart
hoxd_10498	32	6	1	2	5	0	0	0	0	0	0	6	0	6	5	5	5	0.15625	0.833333	muscle, heart
hoxd_10520/1	30	17	17	17	17	17	17	17	0	0	0	3	0	1	0	0	0	0.566667	1	CNS, other neuron, eye
irx1/2/4_6679	45	23	2	2	23	3	0	0	0	0	5	4	1	2	0	0	0	0.511111	1	hindbrain
irx3/5/6_7352	35	9	9	1	9	9	0	9	0	0	0	4	0	6	3	1	0	0.257143	1	forebrain, hindbrain, spinal cord, eye
lmo1_6396	85	34	30	30	30	30	3	1	0	0	0	34	0	34	0	29	0	0.352941	0.882353	muscle, heart
maf_11498	117	50	41	42	50	50	6	0	40	0	0	6	1	35	0	0	0	0.42735	1	hindbrain, spinal cord
meis1_1705	81	54	2	4	54	54	2	0	0	0	1	1	0	1	0	0	0	0.666667	1	hindbrain, spinal cord
meis2a_1042	80	41	2	5	41	50	2	4	2	0	1	18	2	2	0	4	5	0.5125	1	hindbrain
meis2a_1089	130	41	13	15	41	30	11	1	0	0	0	18	0	4	0	11	1	0.315385	1	hindbrain
meis2a_965	92	85	1	1	82	43	7	46	3	0	0	30	0	1	0	55	49	0.891304	0.964706	hindbrain
nr2f2_8394	68	12	0	0	12	3	0	0	0	0	1	0	0	0	0	0	0	0.176471	1	none
nr4a2b_2390	34	10	0	7	8	6	0	0	0	0	0	5	0	5	0	0	0	0.235294	0.8	hindbrain
pax1a_10260	30	11	8	9	8	4	3	4	1	0	0	4	0	1	1	0	0	0.266667	0.727273	hindbrain
pax2a_135	31	11	11	4	6	9	1	3	1	0	0	11	0	9	0	0	0	0.193548	0.545455	forebrain, muscle
pax2a_174	81	50	0	0	50	0	0	50	0	0	0	0	0	0	0	0	0	0.617284	1	hindbrain, eye
pax2a_90	40	29	3	0	11	0	0	1	0	0	1	29	0	0	0	0	0	0.275	0.37931	muscle
pbx3b_3200	91	30	3	9	30	10	0	11	0	0	0	0	0	0	11	0	0	0.32967	1	hindbrain
pbx3b_3211	40	15	6	7	15	2	0	0	0	0	0	14	0	9	0	0	0	0.375	1	hindbrain
pbx3b_3212/3	35	14	1	13	13	0	0	0	0	0	0	0	0	5	0	0	0	0.371429	0.928571	midbrain, hindbrain
pbx3b_3244	39	11	11	11	11	11	8	9	0	0	0	1	0	0	1	11	0	0.282051	1	CNS, pharyngeal arches
pbx3b_3253	80	10	0	0	10	10	0	0	0	0	1	1	0	0	0	0	0	0.125	1	none
pou3f1_7785	40	31	0	0	31	1	0	0	0	0	0	31	0	0	0	0	0	0.775	1	hindbrain, muscle
pou3f2b_9802	75	40	20	23	34	34	0	0	0	0	0	40	0	35	0	0	0	0.453333	0.85	muscle
pou6f2_1568	56	20	0	0	20	0	0	5	0	0	0	8	0	9	0	0	0	0.357143	1	hindbrain
sall3a_2991	30	14	4	5	13	10	14	1	0	0	3	0	0	3	0	3	0	0.433333	0.928571	other neuron
sall3a_3016	30	9	2	3	6	6	0	6	0	0	5	9	1	2	0	0	6	0.2	0.666667	muscle
satb1_5966	113	10	1	2	4	0	6	0	0	0	2	3	6	9	0	0	0	0.0353982	0.4	heart
shox_11103	60	11	3	2	11	11	11	1	0	0	0	0	0	0	0	0	0	0.183333	1	none
shox2_5627	30	14	2	4	14	0	0	0	0	0	0	0	0	0	0	0	0	0.466667	1	hindbrain
shox2_5643	97	19	0	8	19	0	0	0	0	0	0	0	0	0	0	0	0	0.195876	1	none
sox14_11250	71	9	8	7	7	8	0	9	0	0	6	9	0	0	0	9	0	0.0985915	0.777778	eye, muscle, pharyngeal arches
sox6_2298	30	19	0	0	2	7	0	0	0	0	0	0	0	18	0	0	0	0.0666667	0.105263	heart
tcf7l2_5398	67	35	35	1	20	11	19	3	0	0	0	0	0	0	0	0	0	0.298507	0.571429	forebrain
tshz1_8799	30	13	1	8	11	7	0	13	0	0	0	13	0	13	0	0	0	0.366667	0.846154	eye, muscle, heart
tshz1_8800	39	20	8	8	20	17	19	6	0	0	0	6	2	4	0	0	0	0.512821	1	hindbrain
tshz1_8804	35	20	0	0	20	0	0	0	0	0	6	0	0	0	0	0	0	0.571429	1	hindbrain
tshz2_8749	50	11	35	19	28	7	0	0	0	0	0	0	0	0	0	0	0	0.56	2.54545	forebrain
tshz3_7689	48	7	0	0	5	4	0	0	0	0	0	7	0	0	0	0	0	0.104167	0.714286	none
tshz3_7761	55	9	0	0	31	7	5	1	3	0	0	2	1	18	0	31	0	0.563636	3.44444	hindbrain, pharyngeal arches
uncx_9830	44	9	1	1	9	3	2	0	0	0	0	0	1	0	0	0	0	0.204545	1	hindbrain
zic1_5745	30	6	1	1	19	19	0	0	0	0	0	19	0	0	0	0	0	0.633333	3.16667	hindbrain, spinal cord, muscle
zic1_5763	86	13	13	2	12	12	12	3	3	0	0	4	1	1	6	7	12	0.139535	0.923077	forebrain
znf503_10049	40	20	0	0	20	11	0	0	0	0	0	0	0	0	0	9	0	0.5	1	hindbrain
znf503_10105	34	32	1	1	32	1	1	1	0	0	1	6	1	0	0	34	0	0.941176	1	hindbrain, pharyngeal arches
znf503_10147	100	43	0	0	56	0	0	0	0	0	0	0	0	0	0	0	0	0.56	1.30233	hindbrain
znf503_10156	30	10	0	0	10	0	0	0	0	0	0	0	0	0	0	0	0	0.333333	1	hindbrain
znf503_10193	100	31	11	9	9	7	16	31	0	0	0	0	0	0	0	0	0	0.09	0.290323	eye
znf503_10196	71	34	4	4	14	11	30	0	0	0	0	32	0	0	0	32	0	0.197183	0.411765	muscle, pharyngeal arches
znf703_10876	40	16	0	0	16	2	0	0	0	0	0	0	0	0	0	16	0	0.4	1	hindbrain, pharyngeal arches
znf703_10897	31	3	0	0	3	1	0	0	0	0	0	0	0	0	0	3	0	0.0967742	1	none
